# Supplementary material for: Fluorine-Nitrogen-Codoped Carbon Dots as Fluorescent Switch Probes for Selective Fe(III) and Ascorbic Acid Sensing in Living Cells
Source: MDPI journal article supplement (doi:10.3390/molecules27196158), 2022-09-20
Supplement: s1 [file s1]

## Supplementary information

# Fluorine-Nitrogen-Codoped Carbon Dots as Fluorescent Switch Probes for Selective Fe(III) and Ascorbic Acid Sensing in Living Cells

Shuai Ye, Mingming Zhang, Jiaqing Guo, Xiantong Yu, Jun Song, Pengju Zeng, Junle Qu, Yue Chen \* and Hao Li \*

Shenzhen Key Laboratory of Photonics and Biophotonics, Key Laboratory of Optoelectronic Devices and Systems of Ministry of Education and Guangdong Province, College of Physics and Optoelectronic Engineering, Shenzhen University, Shenzhen 518060, China

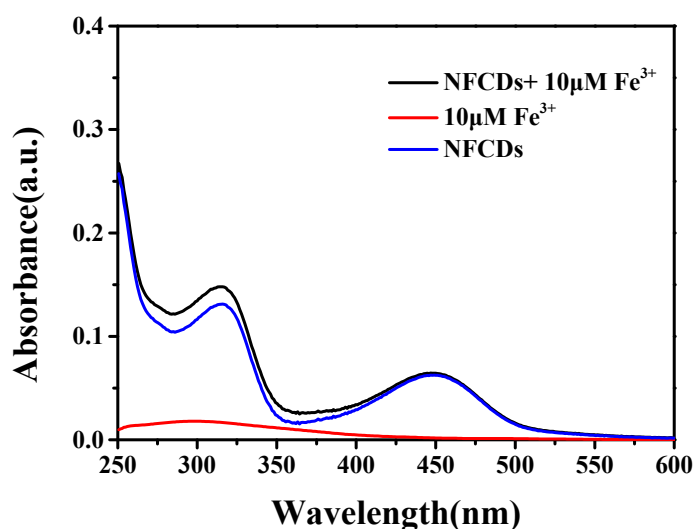

**Figure S1.** Absorption spectra of NFCDs (blue line),  $\text{Fe}^{3+}$  (red line), and NFCDs quenched by  $\text{Fe}^{3+}$  (black line).

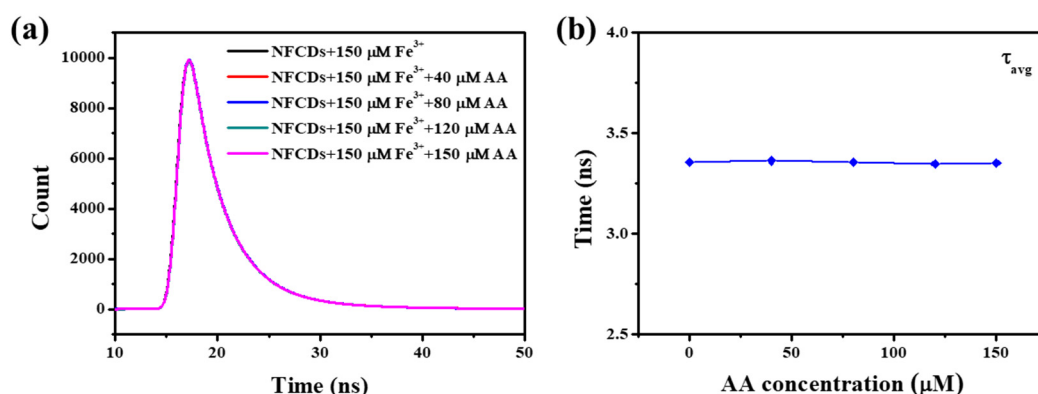

**Figure S2.** (a,b) Fluorescence decay of NFCDs with different concentrations of AA added to the NFCDs (0.1 mg mL<sup>-1</sup>) and  $\text{Fe}^{3+}$  solution (150  $\mu\text{M}$ ).

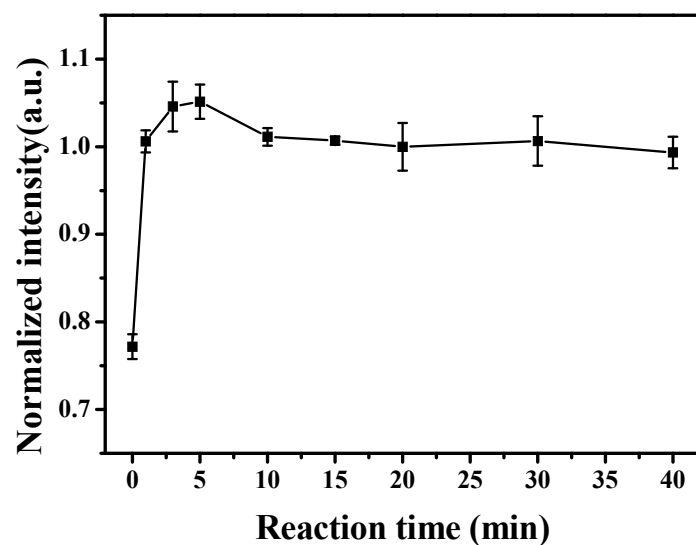

**Figure S3.** After putting NFCDs into the reaction system of  $\text{Fe}^{3+}$  (1 mM) and AA (1 mM), the change of its fluorescence intensity over time.

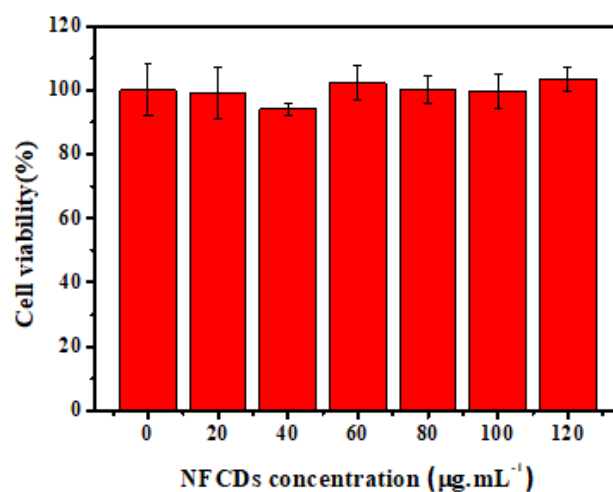

**Figure S4.** Cell viability in different NFCDs concentration ( $\mu\text{g}\cdot\text{mL}^{-1}$ ).

**Table S1.** Double exponential fitting fluorescence lifetime of NFCDs at different  $\text{Fe}^{3+}$  concentrations.

| Component<br>Conce-<br>nitration ( $\mu\text{M}$ ) | $\tau_1$ (ns) | Amplitude of $\tau_1$ | $\tau_2$ (ns) | Amplitude of $\tau_2$ | $\tau_{\text{Avg1}}$ (ns) |
|----------------------------------------------------|---------------|-----------------------|---------------|-----------------------|---------------------------|
| 0                                                  | 2.94          | 4.52                  | 6.77          | 0.51                  | 3.33                      |
| 50                                                 | 3.16          | 4.76                  | 5.45          | 0.52                  | 3.38                      |
| 100                                                | 2.98          | 4.24                  | 5.88          | 0.57                  | 3.328                     |
| 150                                                | 3.12          | 4.37                  | 5.12          | 0.65                  | 3.37                      |

Note:  $\tau_1$  and  $\tau_2$ : fluorescent lifetimes from component 1 and 2,  $\tau_{\text{Avg1}}$ : average fluorescence lifetime; Amplitude of  $\tau_1$ : rate constant of component 1, Amplitude of  $\tau_2$ : rate constant of component 2.

**Table S2.** Double exponential fitting fluorescence lifetime of Fe<sup>3+</sup>/NFCDs at different AA concentrations

| Component<br>Concent-<br>Ration( $\mu$ M) | $\tau_3$ (ns) | Amplitude of $\tau_3$ | $\tau_4$ (ns) | Amplitude of $\tau_4$ | $\tau_{Avg2}$ (ns) |
|-------------------------------------------|---------------|-----------------------|---------------|-----------------------|--------------------|
| 0                                         | 2.97          | 4.72                  | 6.11          | 0.61                  | 3.33               |
| 40                                        | 2.89          | 4.1                   | 5.49          | 0.72                  | 3.28               |
| 80                                        | 2.92          | 4.18                  | 5.9           | 0.57                  | 3.28               |
| 120                                       | 2.79          | 4.04                  | 5.8           | 0.75                  | 3.26               |

Note:  $\tau_3$  and  $\tau_4$ : fluorescent lifetimes from component 1 and 2,  $\tau_{Avg2}$ : average fluorescence lifetime; Amplitude of  $\tau_3$ : rate constant of component 1, Amplitude of  $\tau_4$ : rate constant of component 2.
